# Supplementary material
Source: PubMed Central journal article supplement (PMC555984)

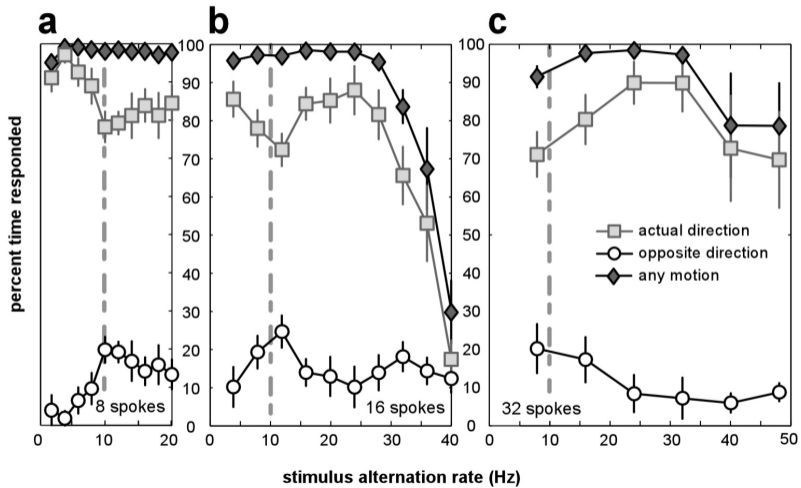

Supplement: pnas_102_14_5291__1.pdf [file pnas_102_14_5291__1.pdf]

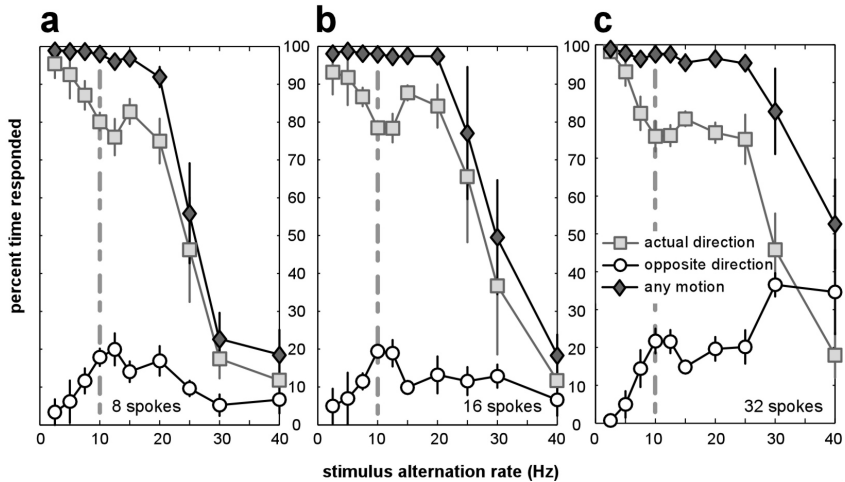

Supplement: pnas_102_14_5291__2.pdf [file pnas_102_14_5291__2.pdf]

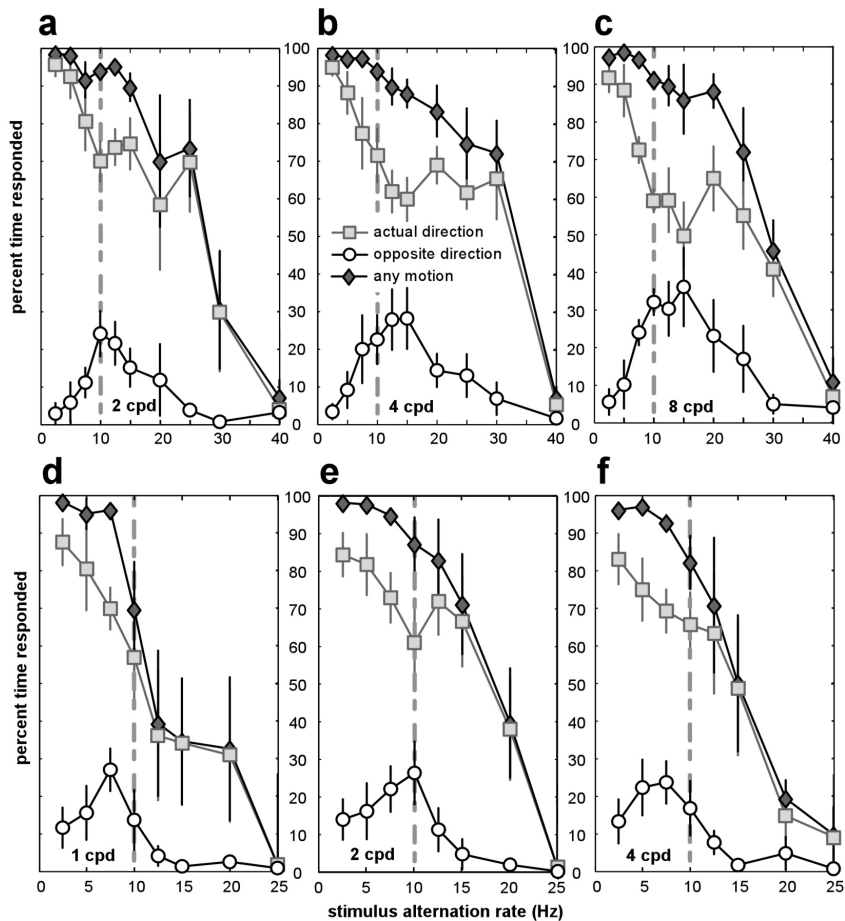

Supplement: pnas_102_14_5291__3.pdf [file pnas_102_14_5291__3.pdf]

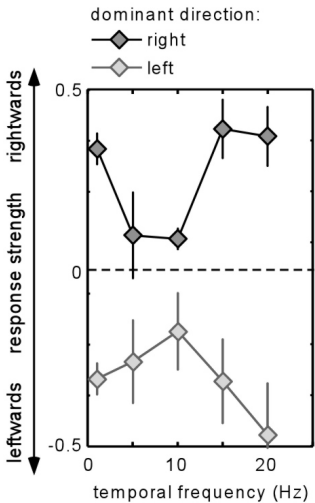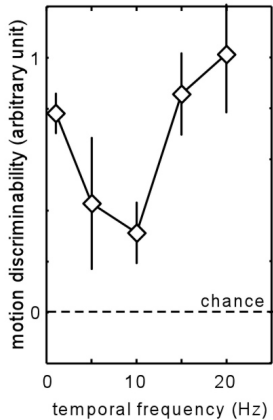

Supplement: pnas_102_14_5291__4.pdf [file pnas_102_14_5291__4.pdf]
